# Supplementary material for: Transcriptional expression of 8 genes predicts pathological response to first-line docetaxel + trastuzumab-based neoadjuvant chemotherapy
Source: Springer Nature journal article supplement (doi:10.1186/s12885-015-1198-9), 2015-03-23
Supplement: MOESM1 [file 9744182]

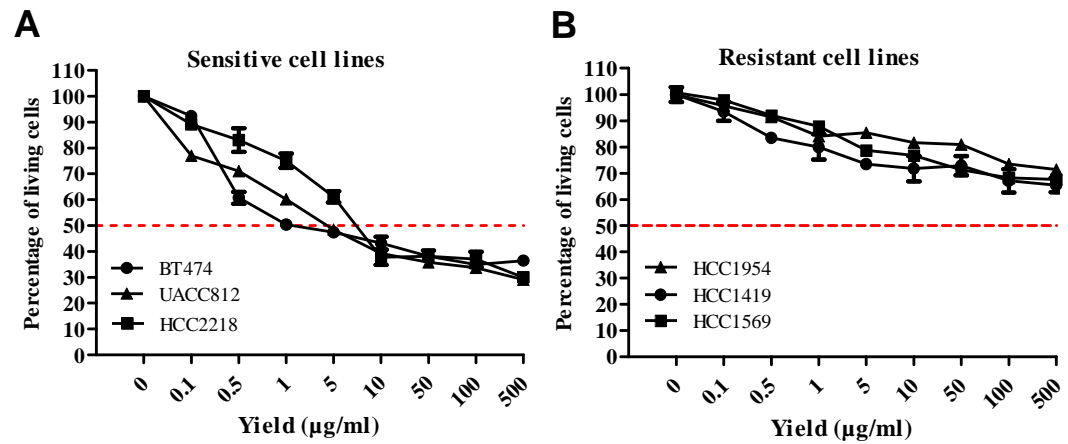

Additional file 2

## **Additional File 2: Characterization of cell line sensitivity to trastuzumab**

The sensitivity of BT474, HCC2218, UACC-812, HCC1419, HCC1954, and HCC1569 cell lines was analyzed with increasing doses of trastuzumab (from 0 to 500  $\mu\text{g/ml}$ ). Among the 6 cell lines, **-A-** BT474, UACC-812, and HCC2218 were sensitive to trastuzumab ( $\text{IC}_{50}$  = 1 $\mu\text{g/ml}$ , 5 $\mu\text{g/ml}$ , and 8 $\mu\text{g/ml}$ , respectively) and **-B-** the 3 others were resistant ( $\text{IC}_{50}$  > 500 $\mu\text{g/ml}$ ).  $\text{IC}_{50}$  is shown by the red dashed line.
