# Supplementary material for: Transcriptional expression of 8 genes predicts pathological response to first-line docetaxel + trastuzumab-based neoadjuvant chemotherapy
Source: Springer Nature journal article supplement (doi:10.1186/s12885-015-1198-9), 2015-03-23
Supplement: MOESM2 [file 9744182]

## Additional File 2: Correlation coefficients obtained for each sample

| Patient # | Response | Sensitive      | Sensitive      | Sensitive      | Resistant      | Resistant      | Resistant       | Prediction | Discordance |
|-----------|----------|----------------|----------------|----------------|----------------|----------------|-----------------|------------|-------------|
|           |          | BT474          | HCC2218        | UACC-812       | HCC1419        | HCC1954        | HCC1569         |            |             |
| 1         | pCR      | 0.04004        | 0.06877        | <u>0.40700</u> | 0.04674        | 0.39591        | 0.38195         | Sensitive  | No          |
| 2         | non pCR  | -0.04530       | -0.06816       | -0.23205       | -0.21415       | -0.05503       | <u>-0.01444</u> | Resistant  | No          |
| 3         | non pCR  | 0.43902        | 0.38675        | 0.75903        | 0.53401        | 0.85581        | <u>0.85938</u>  | Resistant  | No          |
| 4         | non pCR  | 0.29205        | 0.32921        | 0.16184        | 0.25515        | <u>0.42464</u> | 0.40580         | Resistant  | No          |
| 5         | pCR      | <u>0.38109</u> | 0.37936        | 0.02377        | 0.22267        | 0.29696        | 0.31572         | Sensitive  | No          |
| 6         | pCR      | 0.08339        | 0.03969        | 0.10493        | 0.01341        | 0.25179        | <u>0.29458</u>  | Resistant  | Yes         |
| 7         | pCR      | 0.30998        | 0.35352        | 0.42382        | 0.32685        | <u>0.64033</u> | 0.59157         | Resistant  | Yes         |
| 8         | non pCR  | -0.22866       | -0.24229       | -0.16604       | -0.34744       | -0.11324       | <u>-0.07798</u> | Resistant  | No          |
| 9         | pCR      | 0.92538        | <u>0.92761</u> | 0.44639        | 0.90216        | 0.78808        | 0.76504         | Sensitive  | No          |
| 10        | non pCR  | 0.14806        | 0.13935        | 0.48320        | 0.11080        | 0.58735        | <u>0.60093</u>  | Resistant  | No          |
| 11        | pCR      | 0.18148        | <u>0.18658</u> | -0.36346       | 0.14141        | -0.14706       | -0.17048        | Sensitive  | No          |
| 12        | pCR      | 0.21873        | 0.20337        | 0.85752        | 0.32159        | <u>0.79264</u> | 0.78869         | Sensitive  | No          |
| 13        | pCR      | -0.03046       | 0.01892        | 0.45169        | 0.07231        | <u>0.28713</u> | 0.23420         | Sensitive  | No          |
| 14        | non pCR  | 0.31264        | 0.25272        | 0.64901        | 0.34127        | 0.69736        | <u>0.74656</u>  | Resistant  | No          |
| 15        | non pCR  | <u>0.11571</u> | 0.08547        | -0.54448       | -0.10894       | -0.19494       | -0.13648        | Sensitive  | Yes         |
| 16        | non pCR  | <u>0.63469</u> | 0.62601        | -0.03014       | 0.54418        | 0.40453        | 0.41721         | Sensitive  | Yes         |
| 17        | pCR      | 0.60006        | 0.58750        | 0.61276        | 0.55850        | 0.72292        | <u>0.73902</u>  | Resistant  | Yes         |
| 18        | non pCR  | 0.18761        | 0.18534        | <u>0.84955</u> | 0.34017        | 0.75936        | 0.73061         | Sensitive  | Yes         |
| 19        | non pCR  | 0.26965        | 0.25727        | 0.79409        | 0.35624        | <u>0.84622</u> | 0.83652         | Resistant  | No          |
| 20        | pCR      | -0.03281       | -0.08267       | 0.00314        | -0.08338       | 0.06318        | <u>0.10519</u>  | Resistant  | Yes         |
| 21        | non pCR  | 0.17691        | 0.21051        | <u>0.54413</u> | 0.25190        | 0.55859        | 0.50532         | Resistant  | No          |
| 22        | non pCR  | 0.12456        | 0.19407        | 0.18599        | 0.18562        | <u>0.30071</u> | 0.19613         | Resistant  | No          |
| 23        | non pCR  | 0.16894        | 0.15401        | <u>0.52835</u> | 0.28438        | 0.52731        | 0.52498         | Sensitive  | Yes         |
| 24        | non pCR  | 0.67540        | 0.68346        | 0.72218        | 0.73048        | <u>0.88343</u> | 0.85470         | Resistant  | No          |
| 25        | non pCR  | 0.57339        | 0.59725        | 0.67220        | 0.59573        | <u>0.85307</u> | 0.82302         | Resistant  | No          |
| 26        | pCR      | -0.32648       | -0.32339       | <u>0.18971</u> | -0.36140       | -0.01247       | 0.02270         | Sensitive  | No          |
| 27        | pCR      | <u>0.46019</u> | 0.44801        | 0.05162        | 0.38183        | 0.42337        | 0.43863         | Sensitive  | No          |
| 28        | pCR      | <u>0.85864</u> | 0.84531        | 0.10792        | 0.73693        | 0.52585        | 0.52820         | Sensitive  | No          |
| 29        | pCR      | 0.73884        | <u>0.74019</u> | -0.28279       | 0.54666        | 0.23093        | 0.24299         | Sensitive  | No          |
| 30        | pCR      | 0.91856        | <u>0.93028</u> | -0.01449       | 0.77419        | 0.46359        | 0.45198         | Sensitive  | No          |
| 31        | non pCR  | -0.24730       | -0.26466       | 0.10136        | -0.32116       | 0.08631        | <u>0.11908</u>  | Resistant  | No          |
| 32        | non pCR  | -0.31109       | -0.32087       | -0.19537       | -0.43579       | -0.16406       | <u>-0.13098</u> | Resistant  | No          |
| 33        | pCR      | 0.71790        | 0.72608        | 0.59395        | 0.70185        | <u>0.87310</u> | 0.85790         | Resistant  | Yes         |
| 34        | non pCR  | -0.19448       | -0.19059       | -0.20832       | -0.33145       | -0.16302       | <u>-0.13724</u> | Resistant  | No          |
| 35        | non pCR  | 0.02117        | 0.05128        | <u>0.46055</u> | 0.08384        | 0.44397        | 0.40652         | Sensitive  | Yes         |
| 36        | non pCR  | 0.28708        | 0.24290        | 0.74978        | 0.42322        | 0.77357        | <u>0.77726</u>  | Resistant  | No          |
| 37        | non pCR  | -0.22540       | -0.25981       | -0.03351       | -0.32154       | 0.00137        | <u>0.05159</u>  | Resistant  | No          |
| 38        | non pCR  | 0.25099        | 0.31722        | 0.29107        | 0.23424        | <u>0.44468</u> | 0.40481         | Resistant  | No          |
| 39        | non pCR  | 0.25180        | 0.22349        | 0.57761        | 0.22931        | 0.64618        | <u>0.67387</u>  | Resistant  | No          |
| 40        | pCR      | 0.88449        | 0.88924        | 0.33181        | <u>0.92555</u> | 0.66765        | 0.62788         | Resistant  | Yes         |
| 41        | non pCR  | -0.19829       | -0.21529       | -0.07428       | -0.31066       | 0.01050        | <u>0.04862</u>  | Resistant  | No          |
| 42        | non pCR  | 0.10543        | 0.04178        | 0.16638        | <u>0.26492</u> | 0.17246        | 0.16640         | Resistant  | No          |
| 43        | non pCR  | 0.16120        | 0.26058        | 0.24085        | 0.15093        | <u>0.33545</u> | 0.25054         | Resistant  | No          |
| 44        | pCR      | 0.68276        | <u>0.69102</u> | 0.31693        | 0.64211        | 0.65749        | 0.64597         | Sensitive  | No          |
| 45        | non pCR  | 0.40774        | 0.43977        | 0.65796        | 0.46236        | <u>0.75265</u> | 0.72027         | Resistant  | No          |

The underlined coefficient corresponds to the highest, predicting pCR or non-pCR
