# Supplementary material for: Transcriptional expression of 8 genes predicts pathological response to first-line docetaxel + trastuzumab-based neoadjuvant chemotherapy
Source: Springer Nature journal article supplement (doi:10.1186/s12885-015-1198-9), 2015-03-23
Supplement: MOESM3 [file 9744182]

**Additional file 3: Correlation coefficients between expression of the 8 genes and *ErbB2***

| Genes           | Correlation coefficient | <i>p</i> |
|-----------------|-------------------------|----------|
| <i>DERL1</i>    | 0.9                     | < 0.0001 |
| <i>WEE1</i>     | 0.87                    | < 0.0001 |
| <i>PITPNA</i>   | 0.893                   | < 0.0001 |
| <i>FAM114A2</i> | 0.236                   | 0.0048   |
| <i>P2RX1</i>    | 0.452                   | < 0.0001 |
| <i>PSMD11</i>   | 0.898                   | < 0.0001 |
| <i>CTNS</i>     | 0.894                   | < 0.0001 |
| <i>KIAA1549</i> | 0.222                   | 0.0137   |
